# Supplementary material for: Contribution of B,N-co-doped reduced graphene oxide as a catalyst support to the activity of iridium oxide for oxygen evolution reaction
Source: Royal Society of Chemistry journal article supplement (doi:10.1039/d1ta00158b), 2021-01-01
Supplement: d1ta00158b1.pdf [file d1ta00158b1.pdf]

Supporting Information

For

**Contribution of BN-co-doped Reduced Graphene Oxide as a  
Catalyst Support on Activity of Iridium Oxide for Oxygen Evolution  
Reaction**

Perna Joshi<sup>a</sup>, Rohit Yadav<sup>a</sup>, Masanori Hara<sup>a</sup>, Tetsunari Inoue<sup>b</sup>,  
Yukihiro Motoyama<sup>b</sup>, Masamichi Yoshimura<sup>a</sup>

<sup>a</sup>Surface Science Laboratory, <sup>b</sup>Catalytic Organic Chemistry Laboratory

Toyota Technological Institute, Nagoya, Japan

To whom correspondence should be addressed:

Perna Joshi; Phone & Fax: 81-52-809-1852; Email: [joshiperna2011@toyota-ti.ac.jp](mailto:joshiperna2011@toyota-ti.ac.jp);  
[joshi.perna2011@gmail.com](mailto:joshi.perna2011@gmail.com)

List of Figures:

|          |      |
|----------|------|
| Fig. S1  | S-3  |
| Fig. S2  | S-3  |
| Fig. S3  | S-4  |
| Fig. S4  | S-4  |
| Fig. S5  | S-5  |
| Fig. S6  | S-6  |
| Fig. S7  | S-7  |
| Fig. S8  | S-8  |
| Fig. S9  | S-9  |
| Fig. S10 | S-10 |
| Fig. S11 | S-11 |
| Fig. S12 | S-12 |

List of Tables:

|          |      |
|----------|------|
| Table S1 | S-2  |
| Table S2 | S-4  |
| Table S3 | S-5  |
| Table S4 | S-6  |
| Table S5 | S-7  |
| Table S6 | S-8  |
| Table S7 | S-9  |
| Table S8 | S-10 |
| Table S9 | S-11 |

**Table S1** Catalysts with BN-bond structure reported in literature

| <i>Sample</i>                                             | <i>Application (As catalyst/support)</i> | <i>Electrolyte</i>                   | <i><math>\eta/mV</math> at<br/>(<math>j/ mA/cm^2</math>)</i> | <i>Ref.</i> |
|-----------------------------------------------------------|------------------------------------------|--------------------------------------|--------------------------------------------------------------|-------------|
| pure IrO <sub>x</sub>                                     | OER (as catalyst)                        | 1 M KOH                              | 285 (10)                                                     | 1           |
| calcined-IrO <sub>x</sub>                                 | OER (as catalyst)                        | 0.5 M H <sub>2</sub> SO <sub>4</sub> | 260 (10)                                                     | 2           |
| IrO <sub>x</sub> /L-BN                                    | OER (as support)                         | 1 M KOH                              | 259 (10)                                                     | 1           |
| h-BN nanosheets supported on metal substrates (Cu and Au) | HER (as catalyst)                        | 0.1 M HClO <sub>4</sub>              | -770 (20)                                                    | 3           |
| IrO <sub>2</sub> -c-BN                                    | OER (as support)                         | 0.5 M H <sub>2</sub> SO <sub>4</sub> | 400 (10)                                                     | This work   |
| IrO <sub>2</sub> -BN-rGO                                  | OER (as support)                         | 0.5 M H <sub>2</sub> SO <sub>4</sub> | 300 (10)                                                     | This work   |

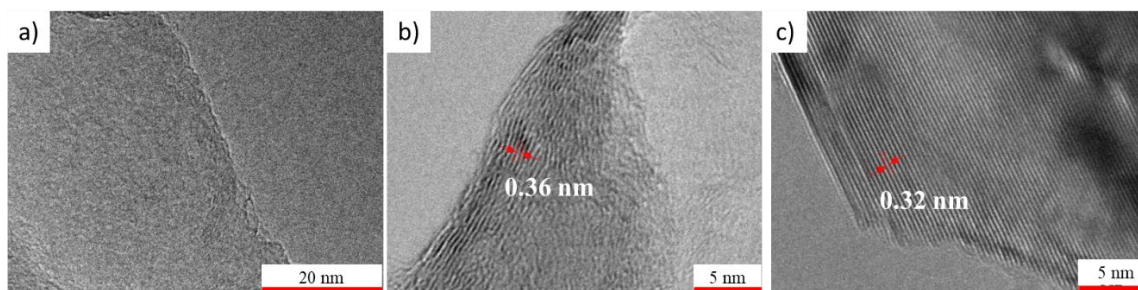

**Fig. S1** TEM images of **a)** GO and **b)** rGO (lattice spacing:  $0.36 \pm 0.02$  nm) and **c)** c-BN sheets (lattice spacing:  $0.32 \pm 0.03$  nm)

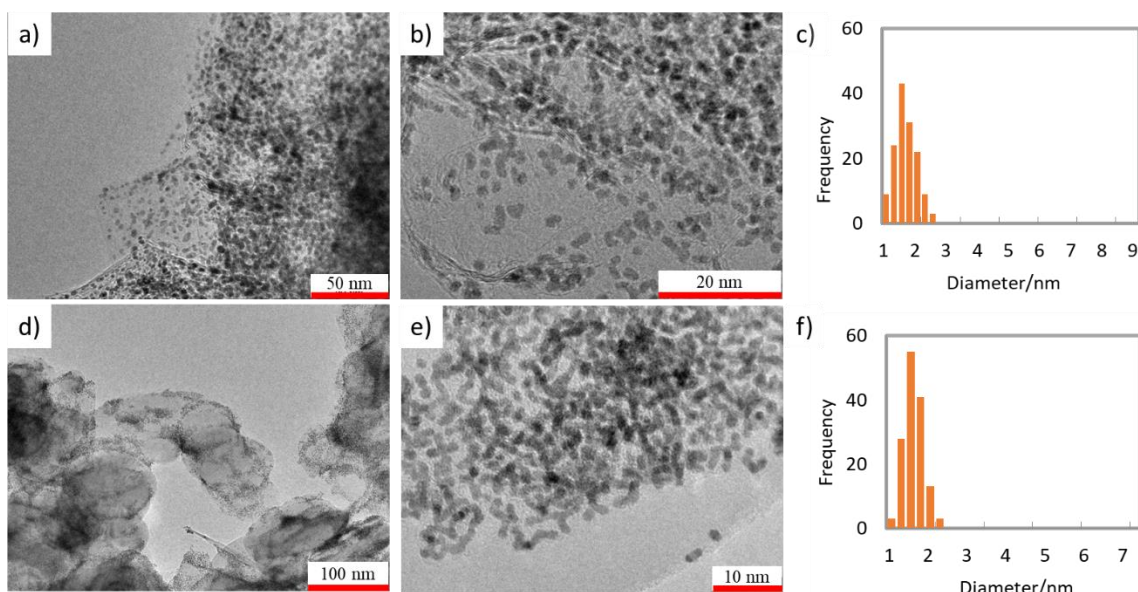

**Fig. S2** TEM images of **a, b)** IrO<sub>2</sub>-rGO, and **c)** its particle distribution. TEM images of **d, e)** IrO<sub>2</sub>-c-BN and **f)** its particle distribution.

For IrO<sub>2</sub>-c-BN, although the particles were homogeneously distributed, the particles appeared both in spherical and non-spherical shapes. The average particle diameter calculated from the spherical nps was  $1.6 \pm 0.3$  nm and the lattice spacing for IrO<sub>2</sub> nps was ca.  $0.23 \pm 0.01$  nm.

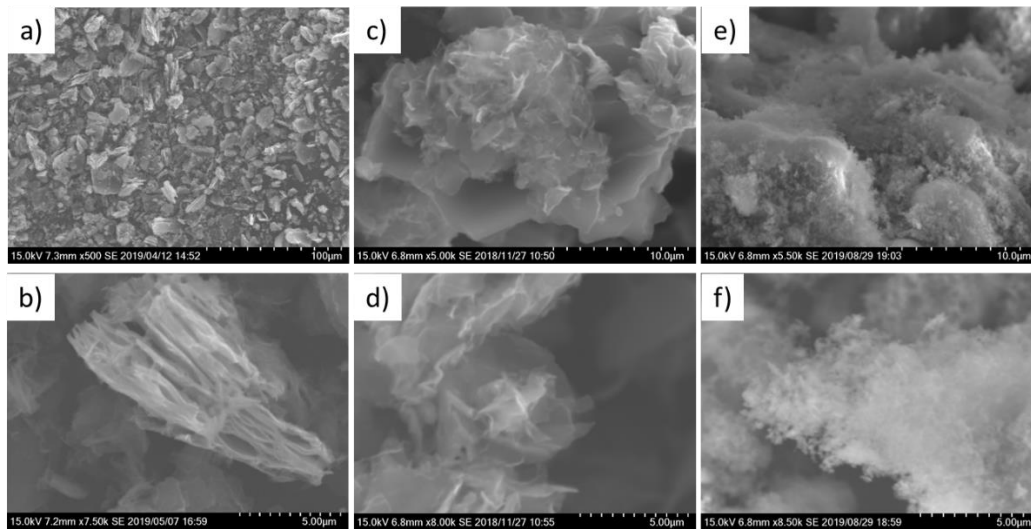

**Fig. S3** SEM images of **a, b)** BN-rGO, **c, d)** rGO and **e, f)** c-BN

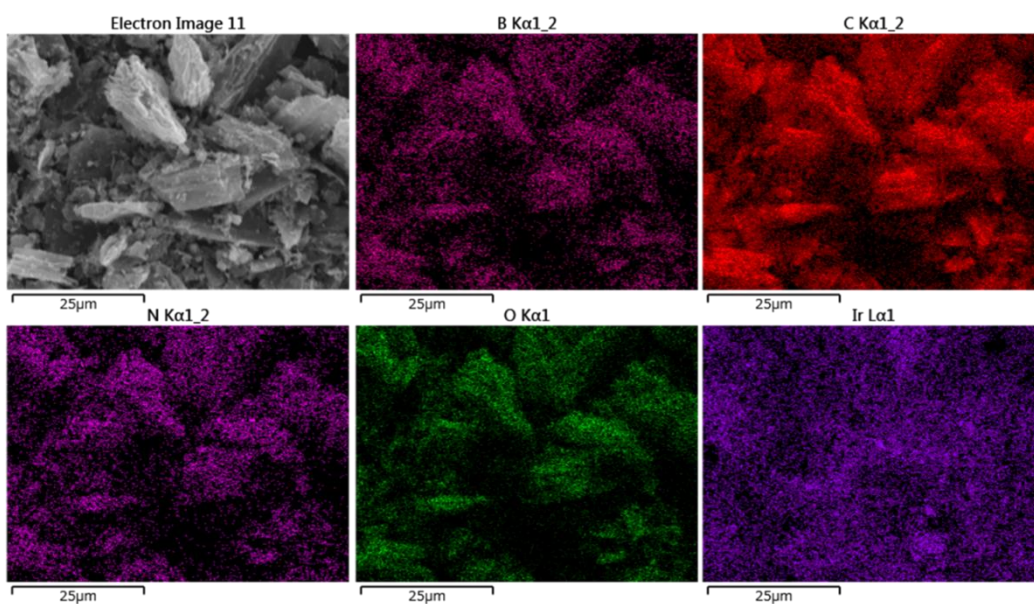

**Fig. S4** EDX mapping of IrO<sub>2</sub>-BN-rGO at 15 kV showing uniform distribution of all the constituent elements

**Table S2** MP-AES results obtained for the designed catalysts

| Catalyst                 | wt.% from EDX | wt.% from MP-AES |
|--------------------------|---------------|------------------|
| IrO <sub>2</sub> -BN-rGO | 12.1 ± 1.2    | 9.8              |
| IrO <sub>2</sub> -rGO    | 11.7 ± 1.2    | 11.2             |
| IrO <sub>2</sub> -c-BN   | 11.2 ± 1.1    | 11.8             |

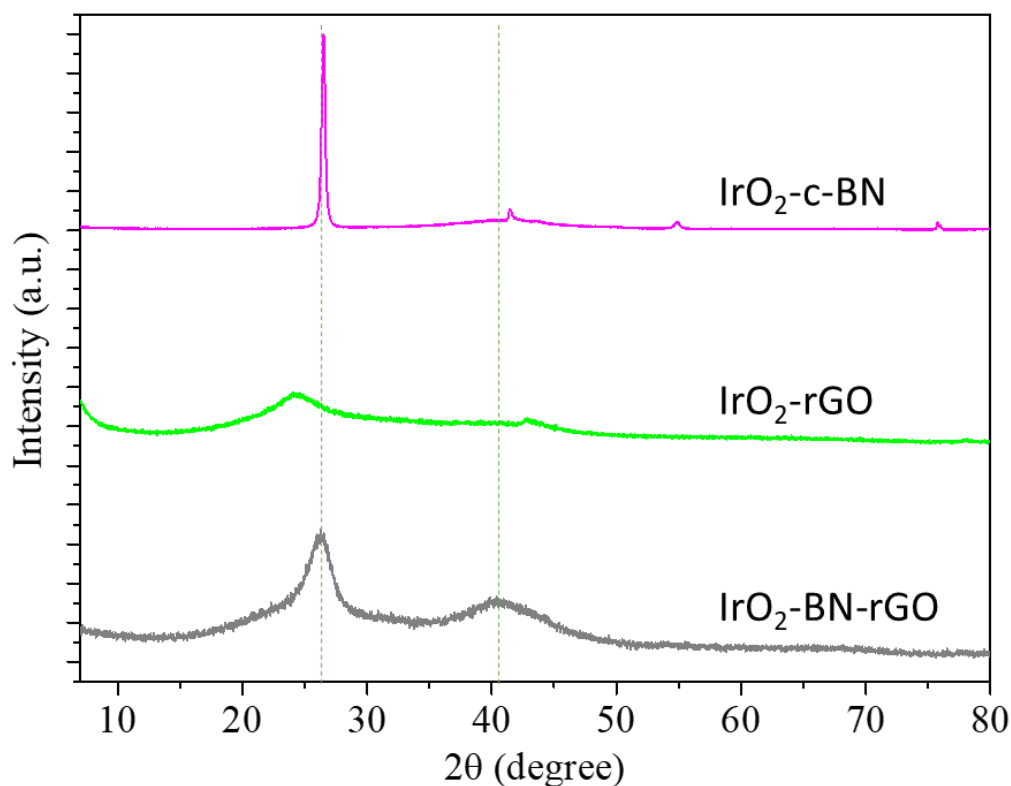

**Fig. S5** XRD profiles of the catalysts, IrO<sub>2</sub>-BN-rGO, IrO<sub>2</sub>-rGO and IrO<sub>2</sub>-c-BN

**Table S3** Calculated *d*-spacing values for GO, rGO, BN-rGO and c-BN supports

| Material | 2θ    | d spacing |
|----------|-------|-----------|
| GO       | 10.96 | 8.06      |
| rGO      | 24.03 | 3.70      |
| BN-rGO   | 26.34 | 3.38      |
| c-BN     | 26.62 | 3.35      |

Similar to BN-rGO, a sharp peak at  $2\theta = 26.5^\circ$ , referring to the (200) crystallographic plane of BN, was observed for c-BN exhibiting the highly crystalline and honeycomb-like hexagonal structure of c-BN comprising of B–N bonds. Additional weak peaks were observed at  $2\theta = 41.5^\circ$ ,  $54.9^\circ$  and  $75.8^\circ$ , corresponding to (100), (101) and (110) planes, respectively, which are consistent with the literature.<sup>4</sup> A small hump at  $2\theta = 40.3^\circ$  was also observed in IrO<sub>2</sub>-c-BN after decoration with IrO<sub>2</sub> nps.



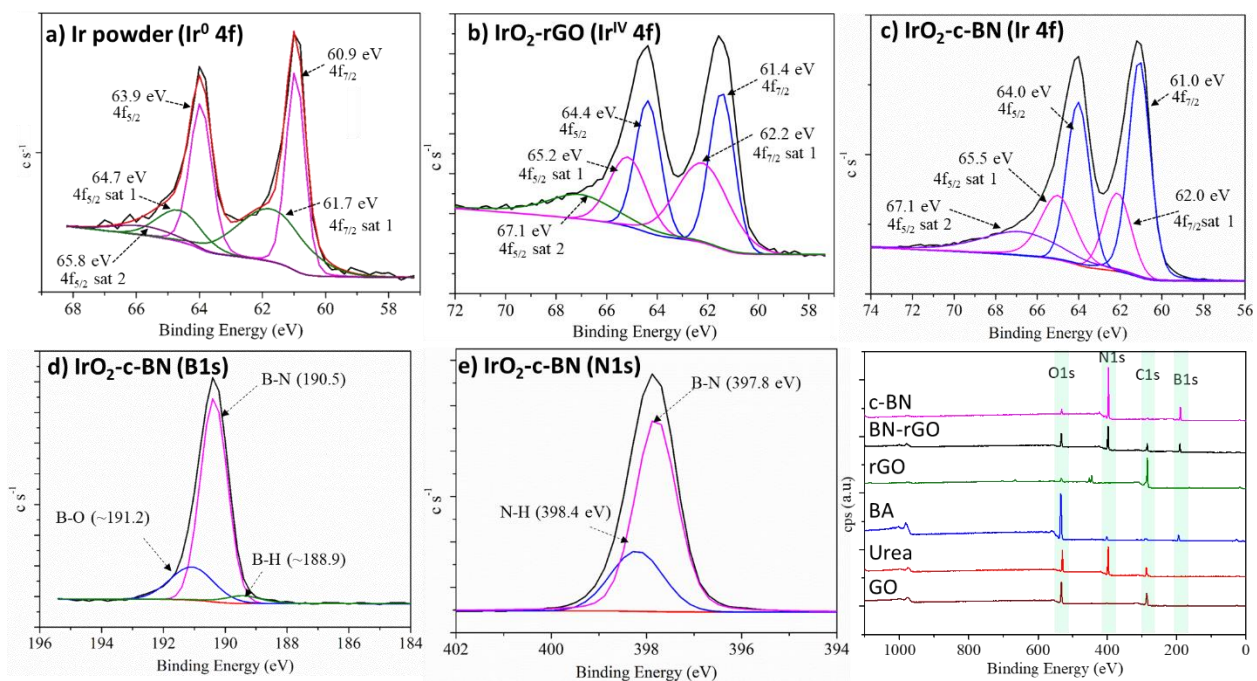

**Fig. S6** Deconvoluted Ir 4f spectra of **a)** Ir powder, **b)** IrO<sub>2</sub>-rGO, and **c)** IrO<sub>2</sub>-c-BN. Deconvoluted **d)** B 1s and **e)** N 1s spectra for IrO<sub>2</sub>-c-BN. **f)** Survey scan of all the precursors and supports

**Table S4** Ir 4f peak positions and peak shift obtained from XPS spectra

| Sample                                                | 4f <sub>7/2</sub> / eV | 4f <sub>5/2</sub> / eV | Peak Shift from Rutile type unsupported IrO <sub>2</sub> / eV |
|-------------------------------------------------------|------------------------|------------------------|---------------------------------------------------------------|
| Ir powder                                             | 60.9                   | 63.9                   | 0.9                                                           |
| IrO <sub>2</sub> -rGO                                 | 61.4                   | 64.4                   | 0.4                                                           |
| IrO <sub>2</sub> -B-rGO <sup>5</sup>                  | 61.2                   | 64.2                   | 0.6                                                           |
| IrO <sub>2</sub> -BN-rGO                              | 61.1                   | 64.1                   | 0.7                                                           |
| IrO <sub>2</sub> -c-BN                                | 61.0                   | 64.0                   | 0.8                                                           |
| Rutile type unsupported IrO <sub>2</sub> <sup>6</sup> | 61.8                   | 64.8                   | 0.0                                                           |

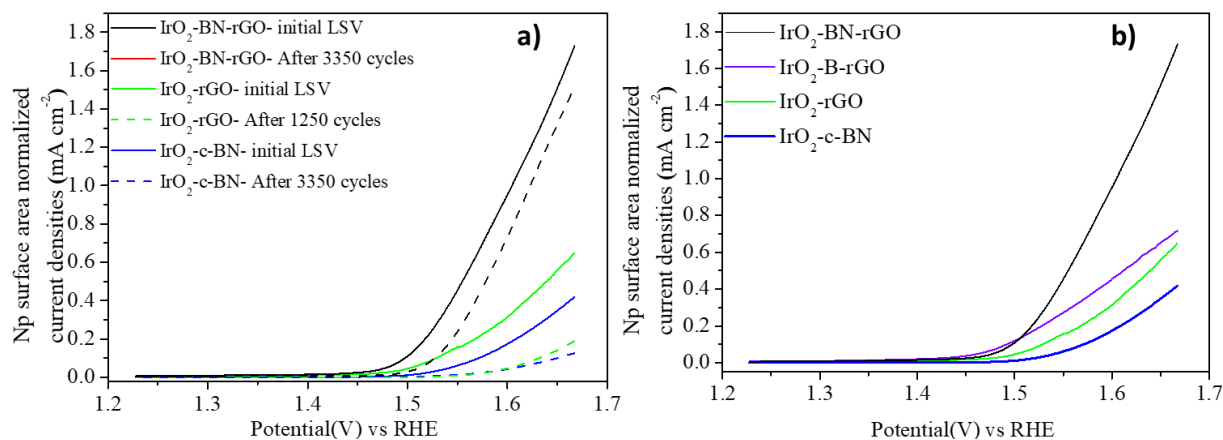

**Fig. S7** Np surface area normalized LSV profiles for IrO<sub>2</sub> supported on different supports (obtained in 0.5 M H<sub>2</sub>SO<sub>4</sub>). The np surface area of IrO<sub>2</sub>-BN-rGO, IrO<sub>2</sub>-c-BN and IrO<sub>2</sub>-rGO was calculated (from TEM) to be 36.56, 36.08 and 40.10 m<sup>2</sup> g<sub>Ir</sub><sup>-1</sup>, respectively.

**Table S5** List of OER activity of IrO<sub>2</sub> catalysts reported in recent literatures in 0.5 M H<sub>2</sub>SO<sub>4</sub> with the value of overpotential measured at 10 mAcm<sup>-2</sup> at respective Ir loading

| Catalyst                          | Loading Ir (mgcm <sup>-2</sup> ) | Overpotential (mV) at 10 mAcm <sup>-2</sup> | Reference |
|-----------------------------------|----------------------------------|---------------------------------------------|-----------|
| Pt/IrO <sub>2</sub>               | 0.300                            | 330                                         | 7         |
| Ir/Ti <sub>4</sub> O <sub>7</sub> | 0.033                            | -                                           | 8         |
| IrO <sub>x</sub> -Ir              | 0.130                            | -                                           | 7         |
| IrO <sub>2</sub>                  | 0.380                            | 282                                         | 5         |
| IrO <sub>2</sub> -rGO             | 0.140                            | 352                                         | This work |
| IrO <sub>2</sub> -N-rGO           | 0.140                            | -                                           | 9         |
| IrO <sub>2</sub> -B-rGO           | 0.140                            | 283                                         | 5         |
| IrO <sub>2</sub> -BN-rGO          | 0.140                            | 300                                         | This work |
| IrO <sub>2</sub> -c-BN            | 0.140                            | 400                                         | This work |
| Comm. IrO <sub>2</sub> powder     | 0.287                            | 430                                         | 5         |

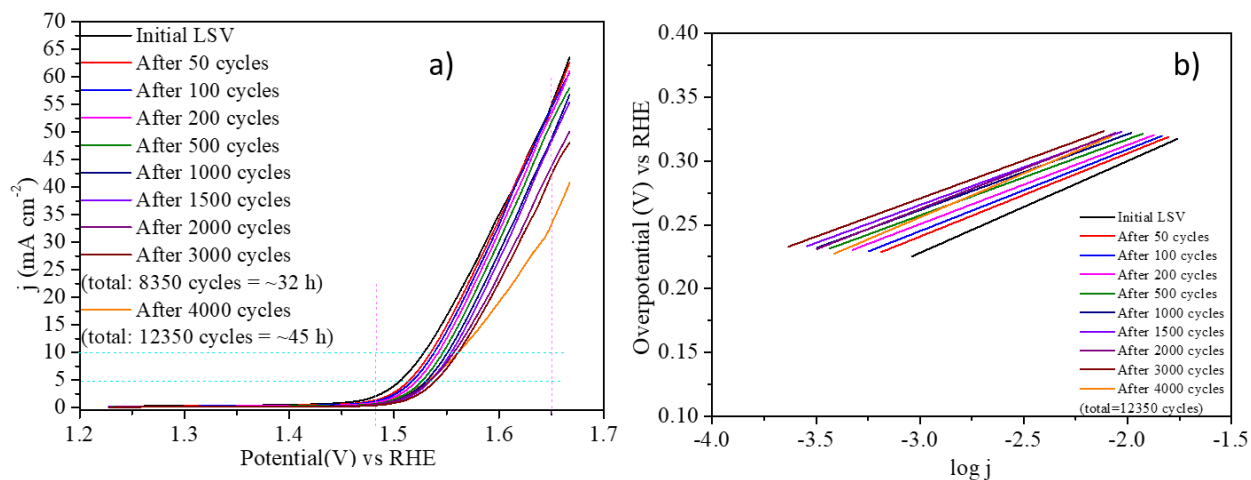

**Fig. S8** a) Current density change of LSV on IrO<sub>2</sub>-BN-rGO (12.1 wt.% Ir) during durability tests for 12350 cycles, and b) calculated Tafel slope of OER on IrO<sub>2</sub>-BN-rGO estimated from LSV curve for all LSV profiles, measured in 0.5 M H<sub>2</sub>SO<sub>4</sub> solution between 1.20 to 1.65 V vs RHE

**Table S6** Calculated current densities ( $j / \text{mAcm}^{-2}$ ) at 1.48 and 1.65 V vs RHE, overpotential ( $\eta / \text{V}$ ) at 5 and 10 mAcm<sup>-2</sup>, onset potential (V), Tafel slope (mV dec<sup>-1</sup>) from LSV curve and calculated mass activities ( $\text{A gr}^{-1}$ ) with increasing no. of cycles for IrO<sub>2</sub>-BN-rGO.

\*All the errors in Tafel slopes are in the range of 10<sup>-4</sup>.

| No of ADT cycles (total cycles) | $j$ (mAcm <sup>-2</sup> ) at 1.48 V | $j$ (mA cm <sup>-2</sup> ) at 1.65 V | $\eta$ (V) at 5 mAcm <sup>-2</sup> | $\eta$ (V) at 10 mAcm <sup>-2</sup> | Onset potential (V) | Tafel slope (mV dec <sup>-1</sup> ) | Mass activity (A gr <sup>-1</sup> ) |
|---------------------------------|-------------------------------------|--------------------------------------|------------------------------------|-------------------------------------|---------------------|-------------------------------------|-------------------------------------|
| 1 (0)                           | 1.92                                | 55.02                                | 0.28                               | 0.30                                | 1.48                | 72.1 ± 0.02                         | 13.82                               |
| 50 (50)                         | 1.25                                | 54.37                                | 0.28                               | 0.30                                | 1.49                | 65.2 ± 0.02                         | 9.13                                |
| 100 (150)                       | 1.09                                | 54.37                                | 0.28                               | 0.31                                | 1.50                | 64.0 ± 0.01                         | 7.76                                |
| 200 (350)                       | 0.89                                | 53.23                                | 0.29                               | 0.31                                | 1.50                | 62.0 ± 0.01                         | 6.38                                |
| 500 (850)                       | 0.67                                | 51.75                                | 0.30                               | 0.32                                | 1.51                | 59.7 ± 0.01                         | 5.51                                |
| 1000 (1850)                     | 0.57                                | 48.89                                | 0.30                               | 0.32                                | 1.51                | 59.5 ± 0.02                         | 4.80                                |
| 1500 (3350)                     | 0.48                                | 48.32                                | 0.30                               | 0.32                                | 1.51                | 59.3 ± 0.01                         | 4.11                                |
| 2000 (5350)                     | 0.57                                | 43.83                                | 0.31                               | 0.33                                | 1.51                | 63.2 ± 0.02                         | 3.50                                |
| 3000 (8350)                     | 0.40                                | 42.28                                | 0.31                               | 0.33                                | 1.52                | 59.6 ± 0.02                         | 4.14                                |
| 4000 (12350)                    | 0.77                                | 33.29                                | 0.30                               | 0.33                                | 1.51                | 68.8 ± 0.01                         | 2.88                                |



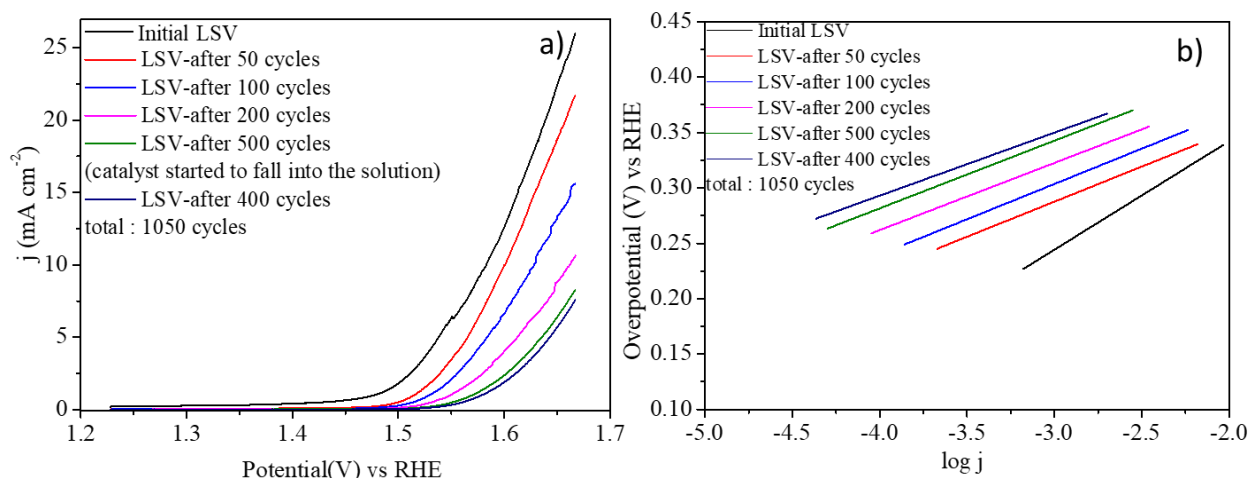

**Fig. S9 a)** Current density change of LSV on IrO<sub>2</sub>-rGO (11.7 wt.% Ir) during durability tests for 1250 cycles, and **b)** calculated Tafel slope of OER on IrO<sub>2</sub>-rGO estimated from LSV curve for all LSV profiles, measured in 0.5 M H<sub>2</sub>SO<sub>4</sub> solution between 1.20 to 1.65 V vs RHE

**Table S7** Calculated current densities ( $j / \text{mAcm}^{-2}$ ) at 1.48 and 1.65 V vs RHE, overpotential ( $\eta / \text{V}$ ) at 5  $\text{mAcm}^{-2}$ , onset potential (V), Tafel slope ( $\text{mV dec}^{-1}$ ) from LSV curve and ca. mass activities ( $\text{A gr}^{-1}$ ) with increasing no. of cycles for IrO<sub>2</sub>- rGO.

| No of ADT cycles (total cycles) | $j$ ( $\text{mAcm}^{-2}$ ) at 1.48 V | $j$ ( $\text{mA cm}^{-2}$ ) at 1.65 V | $\eta$ (V) at 5 $\text{mAcm}^{-2}$ | $\eta$ (V) at 10 $\text{mAcm}^{-2}$ | Onset potential (V) | Tafel slope ( $\text{mV dec}^{-1}$ ) | Mass activity ( $\text{A gr}^{-1}$ ) |
|---------------------------------|--------------------------------------|---------------------------------------|------------------------------------|-------------------------------------|---------------------|--------------------------------------|--------------------------------------|
| 1 (0)                           | 1.05                                 | 22.29                                 | 0.308                              | 0.352                               | 1.47                | $98.0 \pm 0.0005$                    | 7.52                                 |
| 50 (50)                         | 0.23                                 | 18.61                                 | 0.335                              | 0.369                               | 1.50                | $63.3 \pm 0.0004$                    | 1.66                                 |
| 100 (150)                       | 0.13                                 | 13.19                                 | 0.353                              | 0.398                               | 1.51                | $63.7 \pm 0.0005$                    | 0.92                                 |
| 200 (350)                       | 0.06                                 | 8.750                                 | 0.381                              | 0.432                               | 1.54                | $60.7 \pm 0.0004$                    | 0.45                                 |
| 500 (850)                       | 0.04                                 | 6.273                                 | 0.405                              | 0.450*                              | 1.56                | $61.1 \pm 0.0003$                    | 0.28                                 |
| 400 (1250)                      | 0.03                                 | 5.568                                 | 0.410                              | 0.460*                              | 1.57                | $56.9 \pm 0.0003$                    | 0.18                                 |

\*after extrapolation

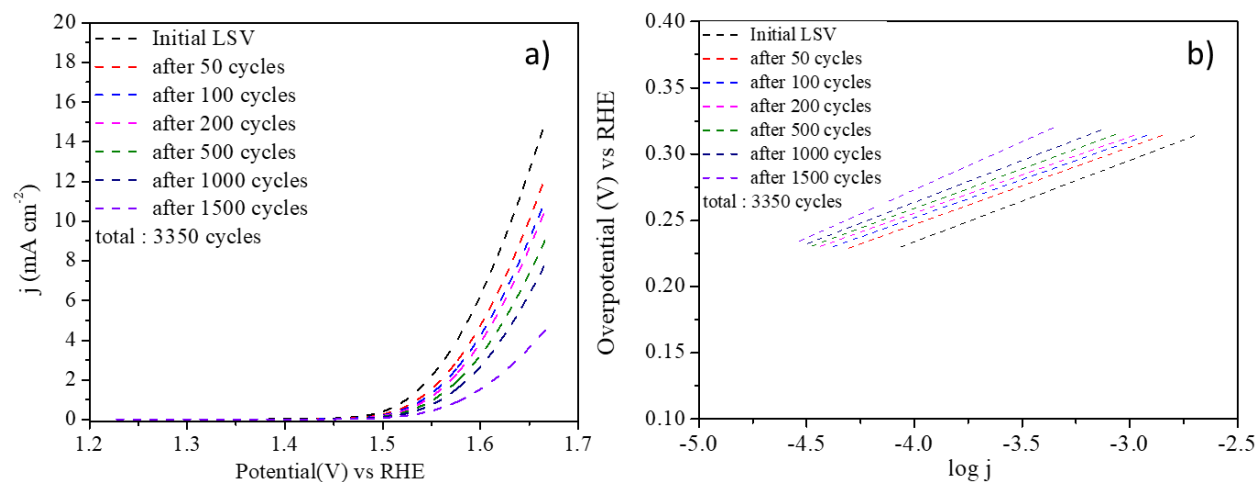

**Fig. S10 a)** Current density change of LSV on IrO<sub>2</sub>-c-BN (11.2 wt.% Ir) during durability tests for 3350 cycles, and **b)** calculated Tafel slope of OER on IrO<sub>2</sub>-BN-rGO estimated from LSV curve for all LSV profiles, measured in 0.5 M H<sub>2</sub>SO<sub>4</sub> solution between 1.20 to 1.65 V vs RHE

**Table S8** Calculated current densities ( $j / \text{mAcm}^{-2}$ ) at 1.48 and 1.65 V vs RHE, overpotential ( $\eta / \text{V}$ ) at 5 and 10 mAcm<sup>-2</sup>, onset potential (V), Tafel slope (mV dec<sup>-1</sup>) from LSV curve and ca. mass activities (A gr<sup>-1</sup>) with increasing no. of cycles for IrO<sub>2</sub>-c-BN.

\*All the errors in Tafel slopes are in the range of 10<sup>-4</sup>.

| No of ADT cycles (total cycles) | $j$ (mAcm <sup>-2</sup> ) at 1.48 V | $j$ (mA cm <sup>-2</sup> ) at 1.65 V | $\eta$ (V) at 5 mAcm <sup>-2</sup> | $\eta$ (V) at 10 mAcm <sup>-2</sup> | Onset potential (V) | Tafel slope (mV dec <sup>-1</sup> ) | Mass activity (A gr <sup>-1</sup> ) |
|---------------------------------|-------------------------------------|--------------------------------------|------------------------------------|-------------------------------------|---------------------|-------------------------------------|-------------------------------------|
| 1 (0)                           | 0.18                                | 12.53                                | 0.36                               | 0.40                                | 1.50                | 61.0 ± 0.01                         | 1.24                                |
| 50 (50)                         | 0.11                                | 10.05                                | 0.37                               | 0.41                                | 1.51                | 58.4 ± 0.02                         | 0.78                                |
| 100 (150)                       | 0.09                                | 9.09                                 | 0.38                               | 0.43                                | 1.52                | 57.7 ± 0.01                         | 0.62                                |
| 200 (350)                       | 0.08                                | 8.64                                 | 0.38                               | 0.43                                | 1.52                | 57.6 ± 0.03                         | 0.56                                |
| 500 (850)                       | 0.07                                | 7.35                                 | 0.39                               | 0.44*                               | 1.52                | 59.7 ± 0.01                         | 0.47                                |
| 1000 (1850)                     | 0.06                                | 6.34                                 | 0.40                               | 0.46*                               | 1.53                | 62.9 ± 0.01                         | 0.40                                |
| 1500 (3350)                     | 0.05                                | 3.63                                 | 0.44*                              | 0.53*                               | 1.55                | 72.6 ± 0.02                         | 0.31                                |
| *after extrapolation            |                                     |                                      |                                    |                                     |                     |                                     |                                     |

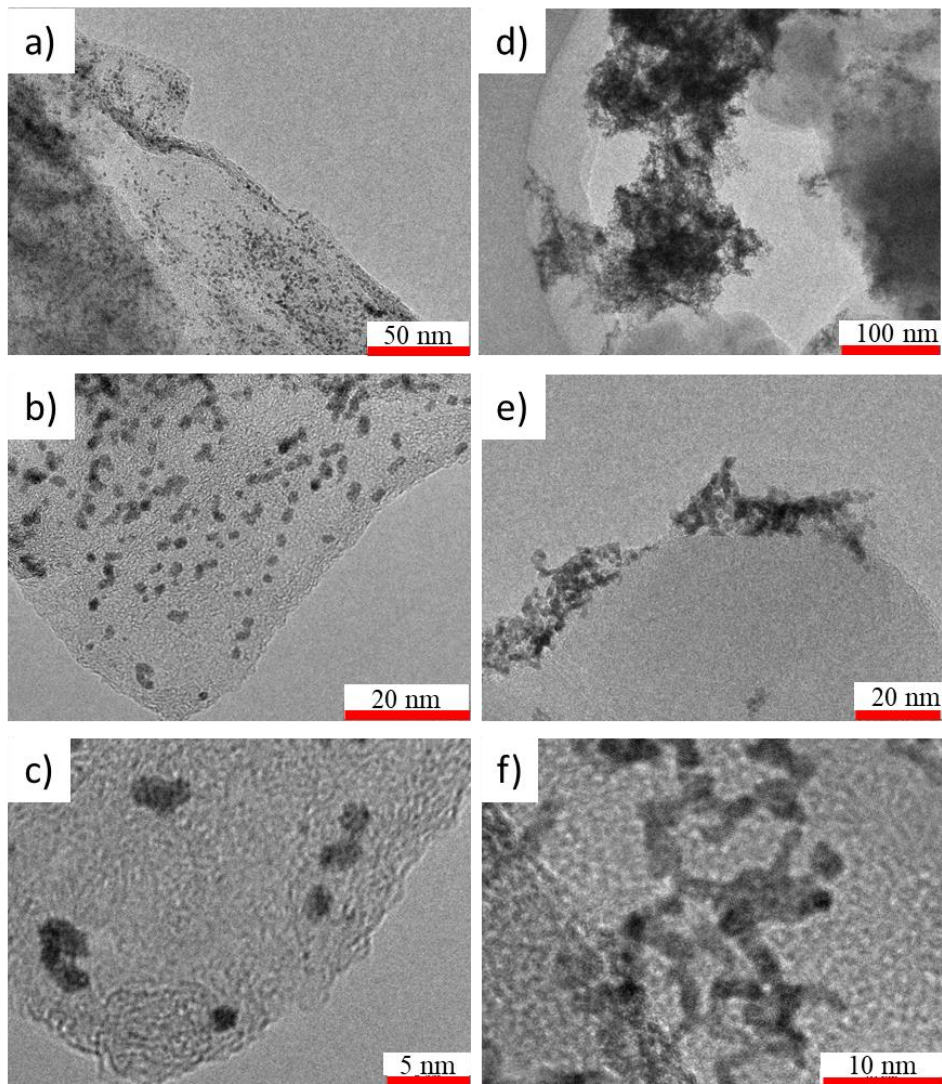

**Fig. S11** TEM images of **a, b, c)** IrO<sub>2</sub>-rGO and **d, e, f)** IrO<sub>2</sub>-c-BN sheets after ADT indicating degradation of IrO<sub>2</sub> nps via aggregation and shape distortion

**Table S9** Elemental composition of IrO<sub>2</sub>-BN-rGO estimated via XPS before and after ADT

| Elements | Element Composition (at. %) |           |
|----------|-----------------------------|-----------|
|          | Before ADT                  | After ADT |
| B 1s     | 34.37                       | 3.07      |
| C 1s     | 2.99                        | 8.43      |
| N 1s     | 29.19                       | 8.32      |
| O 1s     | 27.41                       | 48.73     |
| Si 2p    | -                           | 28.05     |
| Ir 4f    | 5.62                        | 3.41      |

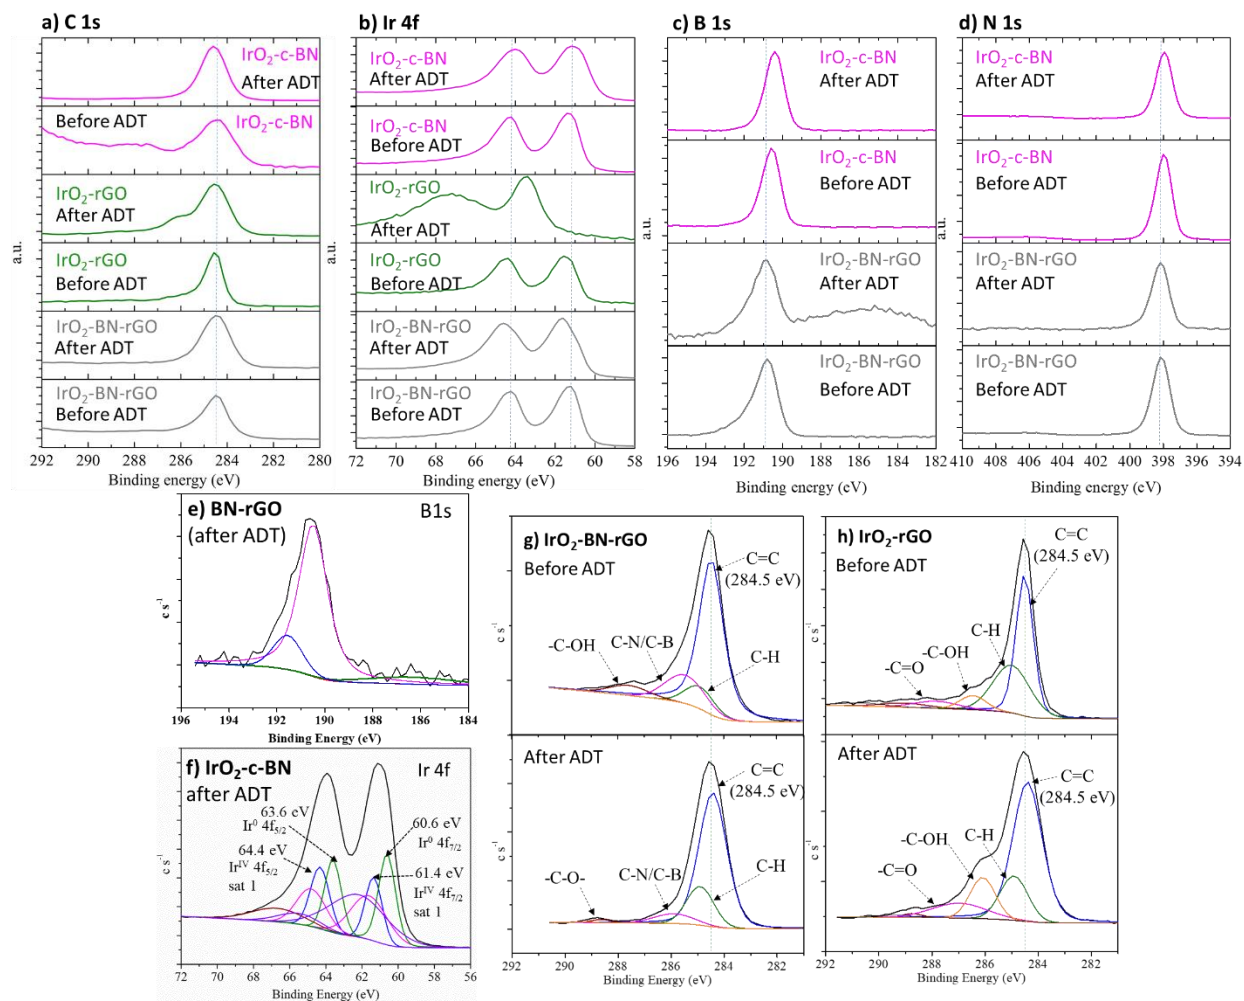

**Fig. S12** Comparison of XPS spectra of **(a)** C 1s and **(b)** Ir 4f **(c)** B 1s, and **(d)** N 1s for IrO<sub>2</sub>-BN-rGO, IrO<sub>2</sub>-rGO and IrO<sub>2</sub>-c-BN before and after ADT; **(e)** B 1s deconvolution of BN-rGO support after ADT; **(f)** Ir 4f deconvolution of IrO<sub>2</sub>-c-BN after ADT. C 1s deconvolution of **(g)** IrO<sub>2</sub>-BN-rGO and **(h)** IrO<sub>2</sub>-c-BN before and after ADT

The Ir 4f deconvolution of IrO<sub>2</sub>-c-BN in **Figure S12f** displayed higher metallic character (high peak intensity and peak area for Ir<sup>0</sup> 4f peaks) compared to IrO<sub>2</sub>-BN-rGO (**Figure 8h**).

### References:

- 1 H. Liu, X. H. Zhang, Y. X. Li, X. Li, C. K. Dong, D. Y. Wu, C. C. Tang, S. L. Chou, F. Fang and X. W. Du, *Adv. Energy Mater.*, 2020, **10**, 1–7.
- 2 G. C. da Silva, N. Perini and E. A. Ticianelli, *Appl. Catal. B Environ.*, 2017, **218**, 287-297.
- 3 D. Q. Liu, B. Tao, H. C. Ruan, C. L. Bentley and P. R. Unwin, *Chem. Commun.*, 2019, **55**, 628-631.

- 4 N. Kostoglou, J. Lukovic, B. Babic, B. Matovic, D. Photiou, G. Constantinides, K. Polychronopoulou, V. Ryzhkov, B. Grossmann, C. Mitterer and C. Rebholz, *Mater. Des.*, 2016, **110**, 540–548.
- 5 P. Joshi, H. H. Huang, R. Yadav, M. Hara and M. Yoshimura, *Catal. Sci. Technol.*, 2020, **10**, 6599–6610.
- 6 V. Pfeifer, T. E. Jones, J. J. Velasco Vélez, C. Massué, M. T. Greiner, R. Arrigo, D. Teschner, F. Girgsdies, M. Scherzer, J. Allan, M. Hashagen, G. Weinberg, S. Piccinin, M. Hävecker, A. Knop-Gericke and R. Schlögl, *Phys. Chem. Chem. Phys.*, 2016, **18**, 2292–2296.
- 7 G. C. Da Silva, M. R. Fernandes and E. A. Ticianelli, *ACS Catal.*, 2018, **8**, 3, 2081–2092.
- 8 P. Lettenmeier, L. Wang, U. Golla-Schindler, P. Gazdzicki, N. A. Cañas, M. Handl, R. Hiesgen, S. S. Hosseiny, A. S. Gago and K. A. Friedrich, *Angew. Chemie - Int. Ed.*, 2016, **55**, 2, 742–746.
- 9 M. Hara, R. Badam, G. J. Wang, H.-H. Huang and M. Yoshimura, *ECS Trans.*, 2018, **85**, 27–35.
